# Supplementary material for: The Escherichia coli Type III Secretion System 2 Has a Global Effect on Cell Surface
Source: PubMed Central journal article supplement (PMC6030553; doi:10.1128/mbio.01070-18), 2018-07-03

FIG 2 Appendix

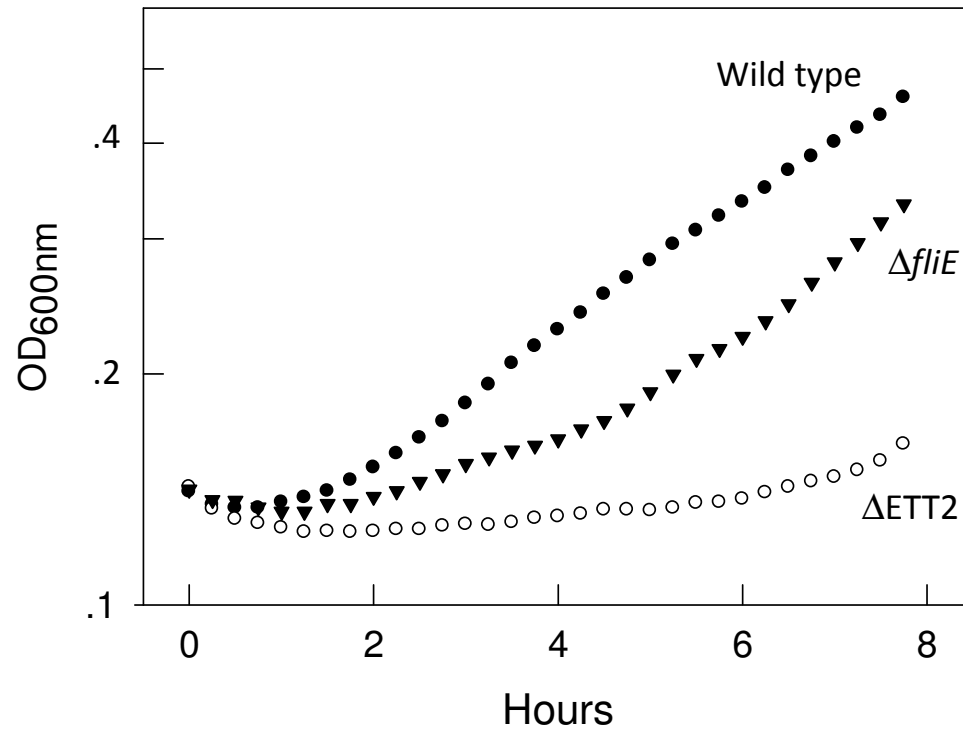

Supplement: mbo003183965sf2.pdf [file mbo003183965sf2.pdf]
